# Supplementary material for: One-step green synthesis of 2D Ag-dendrite-embedded biopolymer hydrogel beads as a catalytic reactor
Source: Royal Society of Chemistry journal article supplement (doi:10.1039/d1ra03536c), 2021-01-01
Supplement: d1ra03536c1.pdf [file d1ra03536c1.pdf]

# **One-Step Green Synthesis of 2D Ag Dendrites-Embedded Biopolymer Hydrogel Beads for Catalytic Reactor**

Jaw Hwan Jeong,<sup>a</sup> Hee-Chul Woo,<sup>b</sup> Mun Ho Kim<sup>a,\*</sup>

<sup>a</sup>Department of Polymer Engineering, Pukyong National University, 45 Yongso-ro, Nam-gu,  
Busan 48513, Republic of Korea

<sup>b</sup>Department of Chemical Engineering, Pukyong National University, 45 Yongso-ro, Nam-gu,  
Busan 48513, Republic of Korea

\* Corresponding author: M. H. Kim (munho@pknu.ac.kr)

(Tel.; +82-51-629-6459, Fax; +82-51-629-6429)

## Supporting Tables

**Table S1.** Activity parameter,  $\kappa$ , values for various heterogeneous catalysts, which is obtained by dividing the reaction rate constant by the total weight of used catalyst.

| Heterogeneous catalysts                                                    | Total weight of used catalyst [mg] | Reaction rate constant ( $k$ ) [ $10^{-3} \text{ s}^{-1}$ ] | $\kappa$ [ $\text{s}^{-1}\text{g}^{-1}$ ] | Ref.             |
|----------------------------------------------------------------------------|------------------------------------|-------------------------------------------------------------|-------------------------------------------|------------------|
| Hollow PS/Au-Hollow PS/Au-Ag NPs                                           | 0.40                               | 2.14                                                        | <b>5.35</b>                               | 1                |
| Hollow PS/Pt-Ag NPs                                                        | 0.40                               | 4.57                                                        | <b>33.43</b>                              | 1                |
| PS with an open hole/Ag NPs                                                | 0.12                               | 1.74                                                        | <b>14.5</b>                               | 2                |
| Porous PS/Ag NPs                                                           | 0.15                               | 5.79                                                        | <b>38.6</b>                               | 3                |
| Cross-linked PS/Au NPs                                                     | 100                                | 25                                                          | <b>0.25</b>                               | 4                |
| Hybrid cryogel/Ag NPs                                                      | 20                                 | 5.03                                                        | <b>0.25</b>                               | 5                |
| Sodium polyacrylate water ball/Ag NPs                                      | 20                                 | 7.67                                                        | <b>0.38</b>                               | 6                |
| Mg-Al layer double hydroxide/Au-Ag NPs                                     | 1                                  | 0.48                                                        | <b>0.48</b>                               | 7                |
| Spherical covalent organic framework/Ag NPs                                | 25                                 | 17.67                                                       | <b>0.71</b>                               | 8                |
| Covalent organic framework@Fe <sub>3</sub> O <sub>4</sub> /Au NPs          | 3                                  | 3.7                                                         | <b>1.23</b>                               | 9                |
| Spindle-shaped PANI/Au NPs                                                 | 31.5                               | 40.4                                                        | <b>1.28</b>                               | 10               |
| SiO <sub>2</sub> @PPy/Au NPs                                               | 31.5                               | 44.2                                                        | <b>1.4</b>                                | 11               |
| Heterocycle-modified PS/Au NPs                                             | 15                                 | 30.7                                                        | <b>2.05</b>                               | 12               |
| Ni@SiO <sub>2</sub> magnetic hollow microspheres/Au                        | 4                                  | 10                                                          | <b>2.5</b>                                | 13               |
| ZnO@Fe <sub>3</sub> O <sub>4</sub> /Ag NPs                                 | 3                                  | 8.18                                                        | <b>2.73</b>                               | 14               |
| Self-assembly of surface-modified Au NPs                                   | 0.9                                | 2.58                                                        | <b>2.87</b>                               | 15               |
| Fe <sub>3</sub> O <sub>4</sub> @PS/Ag                                      | 2                                  | 8.9                                                         | <b>4.45</b>                               | 16               |
| Ca-Al layer double hydroxide hybrid@Fe <sub>3</sub> O <sub>4</sub> /Ag NPs | 1                                  | 5.3                                                         | <b>5.3</b>                                | 17               |
| CNT@PZS/Au NPs                                                             | 0.3                                | 1.78                                                        | <b>5.93</b>                               | 18               |
| MWCNT@S.lavandulifolia/Ag NPs                                              | 3                                  | 19.2                                                        | <b>6.4</b>                                | 19               |
| Graphitic carbon nitride/Au NPs                                            | 2                                  | 15                                                          | <b>7.5</b>                                | 20               |
| Silica nanosheet/Ag NPs                                                    | 10                                 | 80.19                                                       | <b>8.02</b>                               | 21               |
| PAM@PPy@GO/Ag NPs                                                          | 4                                  | 33.8                                                        | <b>8.45</b>                               | 22               |
| Metal-organic framework/Au NPs                                             | 1.5                                | 24.2                                                        | <b>16.13</b>                              | 23               |
| CaCO <sub>3</sub> /Au NPs                                                  | 1                                  | 18                                                          | <b>18</b>                                 | 24               |
| Thiol-functionalized nGO@PEG/Au NPs                                        | 0.07                               | 1.73                                                        | <b>24.71</b>                              | 25               |
| Fe <sub>3</sub> C@NG/Au                                                    | 0.5                                | 17                                                          | <b>34</b>                                 | 26               |
| Alginate bead/Ag dendrites                                                 | <b>0.4</b>                         | <b>16.09</b>                                                | <b>40.23</b>                              | <b>This work</b> |

## Supporting Figures

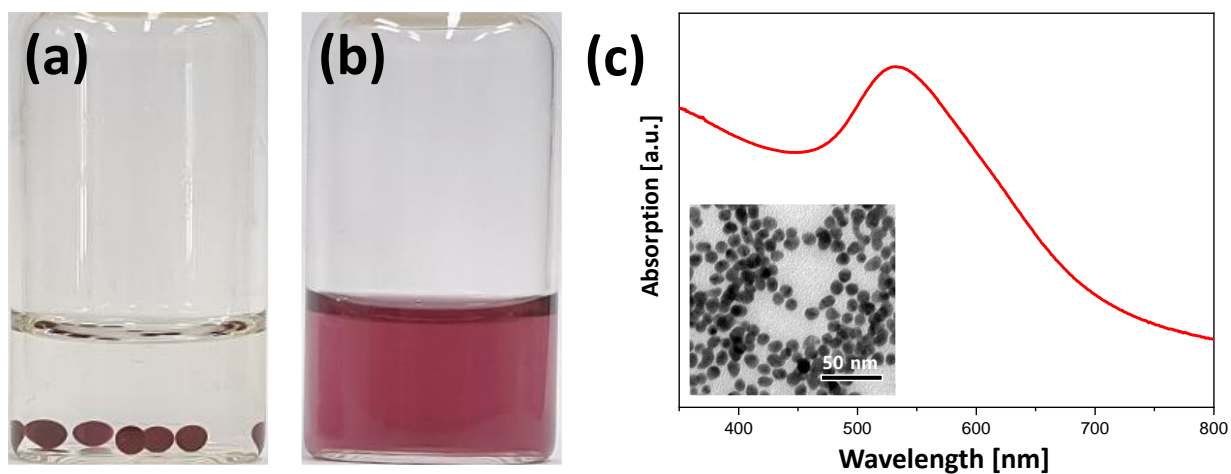

**Fig. S1.** Photographs of droplets of aqueous alginate solution containing Au nanocrystals dropped into (a) 0.125 M  $\text{AgNO}_3$  aqueous solution and (b) pure water. (c) UV-vis absorbance spectrum and TEM image of Au nanocrystals used as pigments in this experiment.

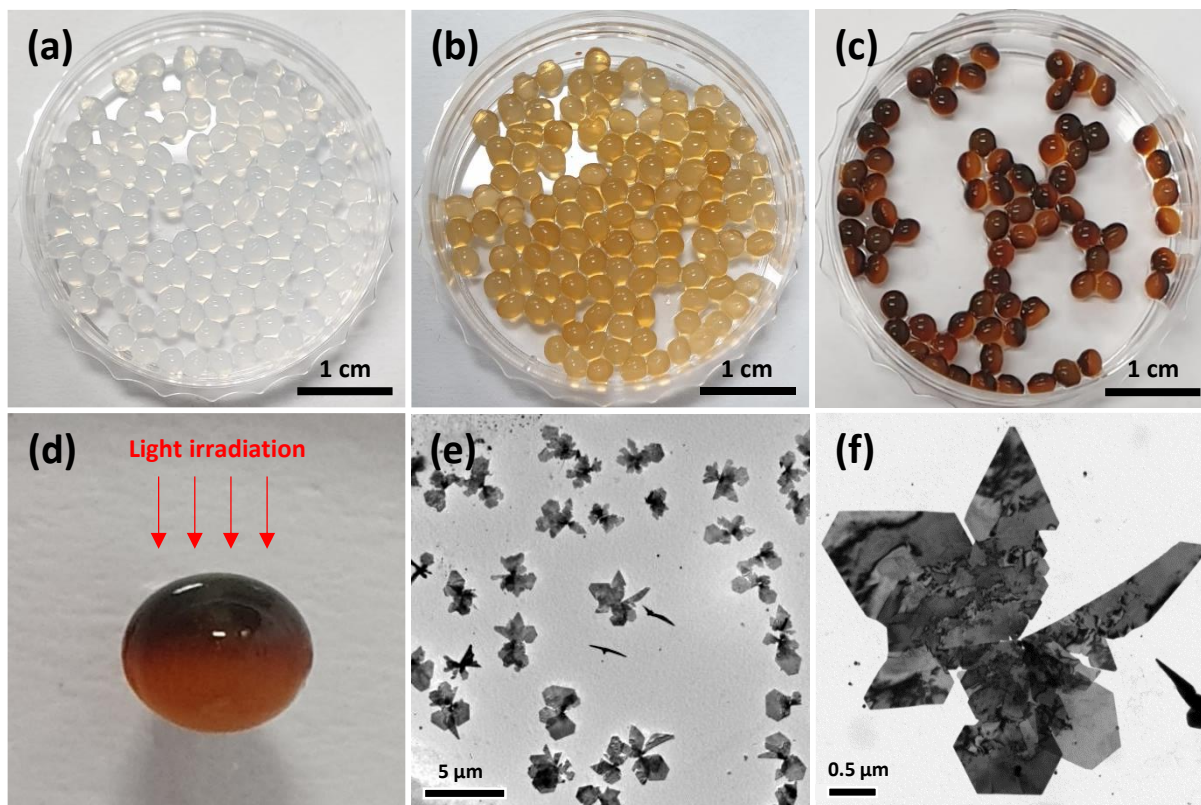

**Fig. S2.** Photographs of hydrogel beads which was aged in the aqueous solution containing  $\text{AgNO}_3$  (a) in the darkroom for 3 h and (b) under the sun light for 3 h. (c)-(d) Photographs of alginate beads obtained after immersing in 0.125 M  $\text{AgNO}_3$  and aging at room temperature for 3 hours under light irradiation. In this experiment, Xenon lamp was used instead of UV lamp and the beads were exposed to light without stirring. (e)-(f) TEM images of Ag nanocrystals formed in the alginate beads shown in (c)-(d).

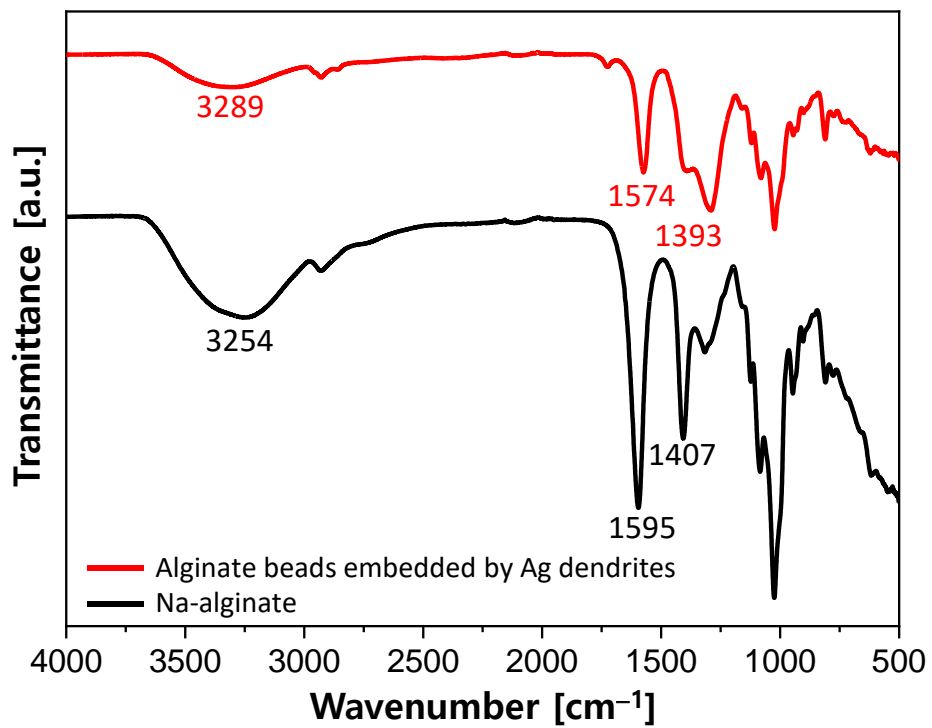

**Fig. S3.** FTIR spectra of pure Na-alginate (red) and alginate beads embedded with 2D Ag dendrites (black).

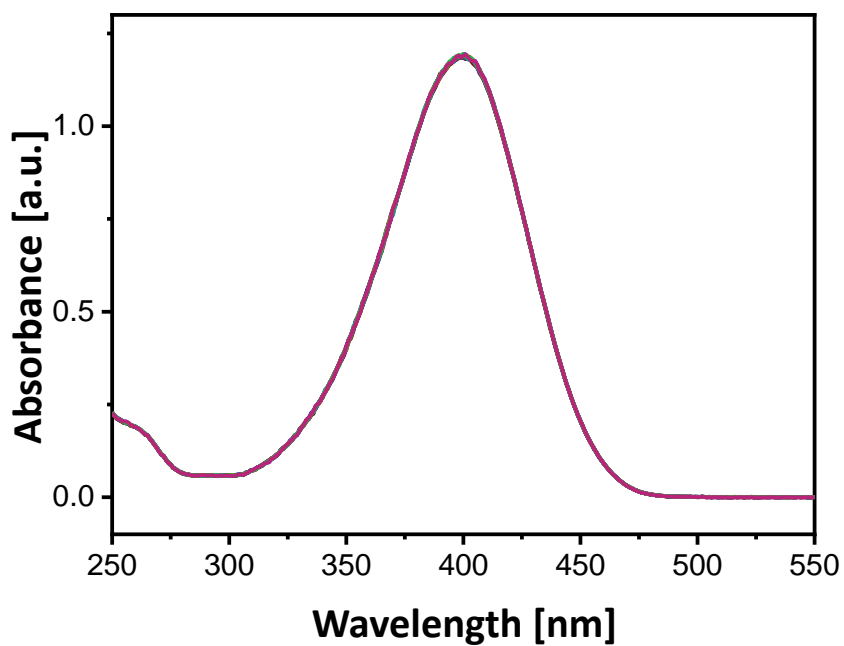

**Fig. S4.** UV–Vis absorption spectra for 10 min after the alginate hydrogel beads cross-linked by  $\text{Ba}^{2+}$  ions (i.e., not covered with Ag nanocrystals) were added to the solution that contained  $\text{NaBH}_4$  and 4-NP.

## References

- [1] S.H. Park, J. Kim, S.H. Hur, D.H. Kim, M.H. Kim, Heterophase polymer dispersion: A green approach to the synthesis of functional hollow polymer microparticles, *Chem. Eng. J.* 348 (2018) 46–56. <https://doi.org/10.1016/j.cej.2018.04.194>.
- [2] D.H. Kim, H.C. Woo, M.H. Kim, Room-Temperature Synthesis of Hollow Polymer Microparticles with an Open Hole on the Surface and Their Application, *Langmuir*. 35 (2019) 13700–13710. <https://doi.org/10.1021/acs.langmuir.9b02780>.
- [3] D.H. Kim, J.H. Jeong, H.C. Woo, M.H. Kim, Synthesis of highly porous polymer microspheres with interconnected open pores for catalytic microreactors, *Chem. Eng. J.* (2020) 127628. <https://doi.org/10.1016/j.cej.2020.127628>.
- [4] D. Shah, H. Kaur, Resin-trapped gold nanoparticles: An efficient catalyst for reduction of nitro compounds and Suzuki-Miyaura coupling, *J. Mol. Catal. A Chem.* 381 (2014) 70–76. <https://doi.org/10.1016/j.molcata.2013.10.004>.
- [5] A. Haleem, J. Chen, X.X. Guo, J.Y. Wang, H.J. Li, P.Y. Li, S.Q. Chen, W.D. He, Hybrid cryogels composed of P(NIPAM-co-AMPS) and metal nanoparticles for rapid reduction of p-nitrophenol, *Polymer (Guildf)*. 193 (2020) 122352. <https://doi.org/10.1016/j.polymer.2020.122352>.
- [6] H.S.H.M. Ali, S.A. Khan, Stabilization of Various Zero-Valent Metal Nanoparticles on a Superabsorbent Polymer for the Removal of Dyes, Nitrophenol, and Pathogenic Bacteria, *ACS Omega*. 5 (2020) 7379–7391. <https://doi.org/10.1021/acsomega.9b04410>.
- [7] N. Arora, A. Mehta, A. Mishra, S. Basu, 4-Nitrophenol reduction catalysed by Au-Ag

- bimetallic nanoparticles supported on LDH: Homogeneous vs. heterogeneous catalysis, *Appl. Clay Sci.* 151 (2018) 1–9. <https://doi.org/10.1016/j.clay.2017.10.015>.
- [8] N. Wang, F. Wang, F. Pan, S. Yu, D. Pan, Highly Efficient Silver Catalyst Supported by a Spherical Covalent Organic Framework for the Continuous Reduction of 4-Nitrophenol, *ACS Appl. Mater. Interfaces.* (2021). <https://doi.org/10.1021/acsami.0c20444>.
- [9] Y. Xu, X. Shi, R. Hua, R. Zhang, Y. Yao, B. Zhao, T. Liu, J. Zheng, G. Lu, Remarkably catalytic activity in reduction of 4-nitrophenol and methylene blue by Fe<sub>3</sub>O<sub>4</sub>@COF supported noble metal nanoparticles, *Appl. Catal. B Environ.* 260 (2020) 118142. <https://doi.org/10.1016/j.apcatb.2019.118142>.
- [10] L. Sun, S. Peng, L. Jiang, Y. Zheng, X. Sun, H. Su, C. Qi, Preparation of spindle-shaped polyaniline supported Au catalysts with enhanced catalytic reduction of 4-nitrophenol, *Colloid Polym. Sci.* 297 (2019) 651–659. <https://doi.org/10.1007/s00396-019-04480-y>.
- [11] L. Sun, L. Jiang, S. Peng, Y. Zheng, X. Sun, H. Su, C. Qi, Preparation of Au catalysts supported on core-shell SiO<sub>2</sub>/polypyrrole composites with high catalytic performances in the reduction of 4-nitrophenol, *Synth. Met.* 248 (2019) 20–26. <https://doi.org/10.1016/j.synthmet.2018.12.024>.
- [12] H. Amari, M. Guerrouache, S. Mahouche-Chergui, R. Abderrahim, B. Carbonnier, 2-Aminothiazole-functionalized triazine-modified polystyrene decorated with gold nanoparticles as composite catalyst for the reduction of 4-nitrophenol, *React. Funct. Polym.* 121 (2017) 58–66. <https://doi.org/10.1016/j.reactfunctpolym.2017.10.018>.
- [13] S. Zhang, S. Gai, F. He, Y. Dai, P. Gao, L. Li, Y. Chen, P. Yang, Uniform Ni/SiO<sub>2</sub>@Au



- magnetic hollow microspheres: Rational design and excellent catalytic performance in 4-nitrophenol reduction, *Nanoscale*. 6 (2014) 7025–7032. <https://doi.org/10.1039/c4nr00338a>.
- [14] M.T. Alula, P. Lemmens, M.L. Madingwane, Determination of cysteine via its inhibition of catalytic activity of silver coated ZnO/Fe<sub>3</sub>O<sub>4</sub> composites used for conversion of 4-nitrophenol into 4-aminophenol, *Microchem. J.* 156 (2020) 104976. <https://doi.org/10.1016/j.microc.2020.104976>.
- [15] G. Wu, X. Liu, P. Zhou, L. Wang, M. Hegazy, X. Huang, Y. Huang, A facile approach for the reduction of 4-nitrophenol and degradation of congo red using gold nanoparticles or laccase decorated hybrid inorganic nanoparticles/polymer-biomacromolecules vesicles, *Mater. Sci. Eng. C*. 94 (2019) 524–533. <https://doi.org/10.1016/j.msec.2018.09.061>.
- [16] Y. Wang, P. Gao, Y. Wei, Y. Jin, S. Sun, Z. Wang, Y. Jiang, Silver nanoparticles decorated magnetic polymer composites (Fe<sub>3</sub>O<sub>4</sub>@PS@Ag) as highly efficient reusable catalyst for the degradation of 4-nitrophenol and organic dyes, *J. Environ. Manage.* 278 (2021) 111473. <https://doi.org/10.1016/j.jenvman.2020.111473>.
- [17] M. Dinari, F. Dadkhah, Swift reduction of 4-nitrophenol by easy recoverable magnetite-Ag/layered double hydroxide/starch bionanocomposite, *Carbohydr. Polym.* 228 (2020) 115392. <https://doi.org/10.1016/j.carbpol.2019.115392>.
- [18] X. Wang, J. Fu, M. Wang, Y. Wang, Z. Chen, J. Zhang, J. Chen, Q. Xu, Facile synthesis of Au nanoparticles supported on polyphosphazene functionalized carbon nanotubes for catalytic reduction of 4-nitrophenol, *J. Mater. Sci.* 49 (2014) 5056–5065. <https://doi.org/10.1007/s10853-014-8212-5>.

- [19] H. Veisi, S. Kazemi, P. Mohammadi, P. Safarimehr, S. Hemmati, Catalytic reduction of 4-nitrophenol over Ag nanoparticles immobilized on *Stachys lavandulifolia* extract-modified multi walled carbon nanotubes, *Polyhedron*. 157 (2019) 232–240. <https://doi.org/10.1016/j.poly.2018.10.014>.
- [20] T.B. Nguyen, C.P. Huang, R. an Doong, Enhanced catalytic reduction of nitrophenols by sodium borohydride over highly recyclable Au@graphitic carbon nitride nanocomposites, *Appl. Catal. B Environ.* 240 (2019) 337–347. <https://doi.org/10.1016/j.apcatb.2018.08.035>.
- [21] Z. Yan, L. Fu, X. Zuo, H. Yang, Green assembly of stable and uniform silver nanoparticles on 2D silica nanosheets for catalytic reduction of 4-nitrophenol, *Appl. Catal. B Environ.* 226 (2018) 23–30. <https://doi.org/10.1016/j.apcatb.2017.12.040>.
- [22] H. Mao, C. Ji, M. Liu, Z. Cao, D. Sun, Z. Xing, X. Chen, Y. Zhang, X.M. Song, Enhanced catalytic activity of Ag nanoparticles supported on polyacrylamide/polypyrrole/graphene oxide nanosheets for the reduction of 4-nitrophenol, *Appl. Surf. Sci.* 434 (2018) 522–533. <https://doi.org/10.1016/j.apsusc.2017.10.209>.
- [23] J. Liu, H. Yu, L. Wang, Effective reduction of 4-nitrophenol with Au NPs loaded ultrathin two dimensional metal-organic framework nanosheets, *Appl. Catal. A Gen.* 599 (2020) 117605. <https://doi.org/10.1016/j.apcata.2020.117605>.
- [24] Q. Ding, Z. Kang, L. Cao, M. Lin, H. Lin, D.P. Yang, Conversion of waste eggshell into difunctional Au/CaCO<sub>3</sub> nanocomposite for 4-Nitrophenol electrochemical detection and catalytic reduction, *Appl. Surf. Sci.* 510 (2020) 145526. <https://doi.org/10.1016/j.apsusc.2020.145526>.

- [25] B. Hao, G. Lu, S. Zhang, Y. Li, A. Ding, X. Huang, Gold nanoparticles standing on PEG/PAMAM/thiol-functionalized nanographene oxide as aqueous catalysts, *Polym. Chem.* 11 (2020) 4094–4104. <https://doi.org/10.1039/d0py00471e>.
- [26] Y.L. Wang, Y.M. Dai, M.H. Tsai, Highly efficient and recyclable Fe<sub>3</sub>C/Au@NG catalyst for 4-nitrophenol reduction, *Catal. Commun.* 149 (2021) 106251. <https://doi.org/10.1016/j.catcom.2020.106251>.
